# Supplementary material for: Characterization of the human DYRK1A promoter and its regulation by the transcription factor E2F1
Source: PubMed Central journal article supplement (PMC2292204; doi:10.1186/1471-2199-9-30), 2008-03-26
Supplement: 1471-2199-9-30-S2.pdf [file 1471-2199-9-30-S2.pdf]

## **Additional file 2:**

### **Vector construction and oligonucleotide sequences**

#### **Construction of reporter gene plasmids**

All human promoter constructs were obtained by PCR cloning from genomic DNA isolated from the human HEK293 cell line. Amplification of the highly GC-rich template was achieved by using the JumpStart REDAccuTaq LA polymerase mix (Sigma-Aldrich) and adding DMSO to the reaction mix at a final concentration of 9%. The reporter construct for the putative promoter in front of human exon 1M (TSS-M) contained bp –2726 to –1899. Promoter constructs for TSS A and TSS B contained fragments of variable length as indicated in the figure legends. Suitable restriction sites were introduced by the design of the PCR primers. PCR products were cloned between the *NheI*-site and the *BglIII*-site (exon 1M) or between the *NheI*-site and the *HindIII*-site (all other human constructs) in front of the firefly luciferase cDNA in the vector pGL3-basic (Promega, Mannheim, Germany). Sequencing of several independent clones revealed the presence of an additional G between bp –200 and –201 in comparison with the human genome sequence accessible at the UCSC Genome Bioinformatics Site ([genome.ucsc.edu](http://genome.ucsc.edu); release hg18). This difference is a known insertion/deletion polymorphism (refSNP ID:rs34481457). In addition, the following differences from the database sequence were identified: construct –1453, T(-938)C, construct –904, C(-676)T, construct –418, G(-179)A and C(-13)T. Construct -1453 was used as a template to amplify the other deletion fragments.

### Sequences of the oligonucleotides used for PCR and as EMSA probes

Oligonucleotides used as primers for RACE and for PCR in Fig. 2

| Primer | Sequence 5' → 3'             |         |
|--------|------------------------------|---------|
| Rev1   | GGCTGGCGACGGTCACTGTA CTGATG  | Exon 3  |
| Rev2   | GTCCAGCCATCTGAAGGCCAGCAG     | Exon 3  |
| 1Afor  | AATTGCTAGCGTCCGTCGCCATTTTGTG | Exon 1A |
| 1Bfor  | CCGAGGCTGAGACTCAC            | Exon 1B |

Oligonucleotide primers for cloning of promoter constructs

| Position relative to TSS-B                                                                                | Sequence 5' → 3'                                                                                                                                                                                                                                                                                                                           | Restriction site              |
|-----------------------------------------------------------------------------------------------------------|--------------------------------------------------------------------------------------------------------------------------------------------------------------------------------------------------------------------------------------------------------------------------------------------------------------------------------------------|-------------------------------|
| -2726for<br>-1899rev                                                                                      | AATTGCTAGCTTGGTTGTATAGGTGGAAGC<br>AATTAGATCTCAGAGTCTTAATTGCCTGC                                                                                                                                                                                                                                                                            | <i>NheI</i><br><i>BglII</i>   |
| -1453for<br>-756rev                                                                                       | AATTGCTAGCTTCGAAGAACCGGCTCCACG<br>TTAAAAGCTTCAACAAAATGGCGAC                                                                                                                                                                                                                                                                                | <i>NheI</i><br><i>HindIII</i> |
| -904for<br>-839for<br>-742for<br>-647for<br>-541for<br>-418for<br>-324for<br>-226for<br>-114for<br>+44rev | AATTGCTAGCGAACGGAATCTGCCGTTACC<br>AATTGCTAGCGAGGACGTCAGCACGTCAGC<br>AATTGCTAGCTAAACCCTTTGCTTCCCGC<br>AATTGCTAGCACTGCTGCTGTCGCTGCTGC<br>AATTGCTAGCCCTGCTGCTGCTGTTGGTGC<br>AATTGCTAGCGAGTGTCTGTCTGTCTGTGC<br>AATTGCTAGCCGCTGCGCAGGTTCCGGAGC<br>AATTGCTAGCGCCGACGCCGCCCTCTGC<br>AATTGCTAGCGCCGCTGGAACCGCGAGC<br>AATTAAGCTTTTCTCCGGTGAGTCTCAGC | <i>NheI</i>                   |

Oligonucleotides used for site directed mutagenesis:

|                       | Sequence 5' → 3'                                                                         |              |
|-----------------------|------------------------------------------------------------------------------------------|--------------|
| Mutation of E2F1 site | GGACTGCGGTATTTCCATGGGAGGGGGCTGTC<br>GACAGCCCCCTCCCATGGAAATACCGCAGTCC                     | <i>NcoI</i>  |
| Mutation of Sp1 sites | GCGCCGGGGGTAGAGAGAGGCTGCCAGATCTGCGCTGGCTGCG<br>CGCAGCCAGCGCAGATCTGGCAGCCTCTCTACCCCCGGCGC | <i>BglII</i> |

Oligonucleotides used for EMSA probes:

| Name of probe                | Sequence 5' → 3'                                           |
|------------------------------|------------------------------------------------------------|
| Consensus CRE                | AGAGATTGCCTGACGTCAGAGAGCTAG<br>CTAGTCTCTGACGTCAGGCAATCTCT  |
| Mutated CRE                  | CAGGTAGATCTGTGGTCAAGAGATGGC<br>GCCATCTCTTGACCACAGATCTACCTG |
| CRE-like motif in promoter A | GGCGGGAGGAGGACGTCAGCACGTCAG<br>CTGACGTGCTGACGTCCTCCTCCCGCC |
